# Supplementary material for: An Assessment of Fixed and Native Chromatin Preparation Methods to Study Histone Post-Translational Modifications at a Whole Genome Scale in Skeletal Muscle Tissue
Source: PubMed Central journal article supplement (PMC5576305; doi:10.1186/s12575-017-0059-0), 2017-08-29

## Additional file 1

**Figure S1: Setup of chromatin preparation conditions.** (A) Gel electrophoresis (1% agarose stained with GelRed, Biotium, Fremont, USA) of cross-linked and sonicated chromatin. Cross-linking was reversed before migration. Lane 1: GeneRuler 1 kb DNA Ladder, ref. SM0311, Thermo-Scientific, Waltham, USA. Lanes 2 to 5: FA 1 % for 5 min followed by respectively 2 x 5, 3 x 5, 4 x 5 or 6 x 5 min of sonication. Lanes 6 to 8: FA 1 % for 15 min followed by respectively 2 x 5, 4 x 5 or 6 x 5 min of sonication. Lanes 9 to 11: FA 2 % for 30 min followed by respectively 2 x 5, 4 x 5, 6 x 5 min of sonication. (B) Gel electrophoresis (1% agarose stained with GelRed) of Mnase digested chromatin. Lane 1: GeneRuler 1 kb DNA Ladder. Lane 2: 10 U Mnase for 7 min. Lane 3: 10 U Mnase for 10 min. Lane 4: 20 U Mnase for 10 min. Lane 5: 10 U Mnase for 15 min. Lane 6: 20 U Mnase for 15 min. Lane 7: GeneRuler 50 bp DNA Ladder, ref. SM0371, Thermo-Scientific, Waltham, USA. (C) Gel migration (1% agarose stained with GelRed) of muscle X-ChIP chromatin samples used for the sequencing. Lane 1: GeneRuler 50 bp DNA Ladder. Lane 2: Replicate 1 (X\_R1). Lane 3: Replicate 2 (X\_R2). Lane 4: GeneRuler 1 kb DNA Ladder. (D) Gel migration (1% agarose stained with GelRed) of muscle N-ChIP chromatin samples used for the sequencing. Lane 1: Replicate 1 (N\_R1). Lane 2: Replicate 2 (N\_R2). Lane 3: 100 bp DNA marker ref. 523002, Ready-to-use DNA Markers: 100 bp, Dominique Dutscher, Brumath, France.

**A**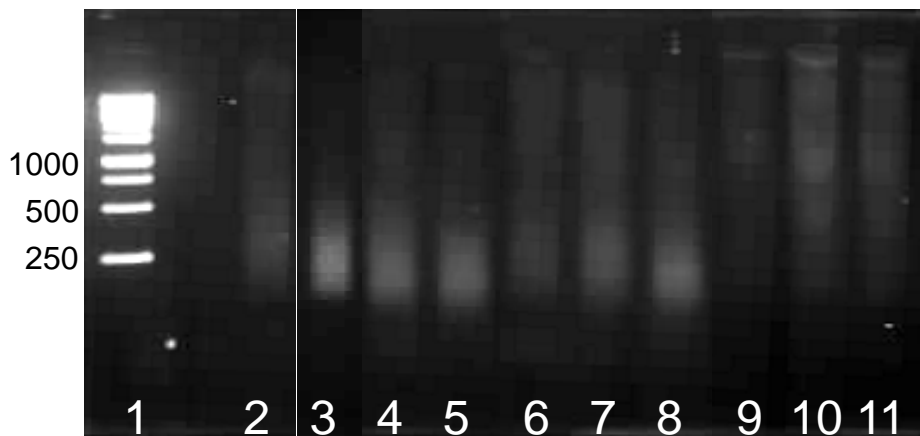**B**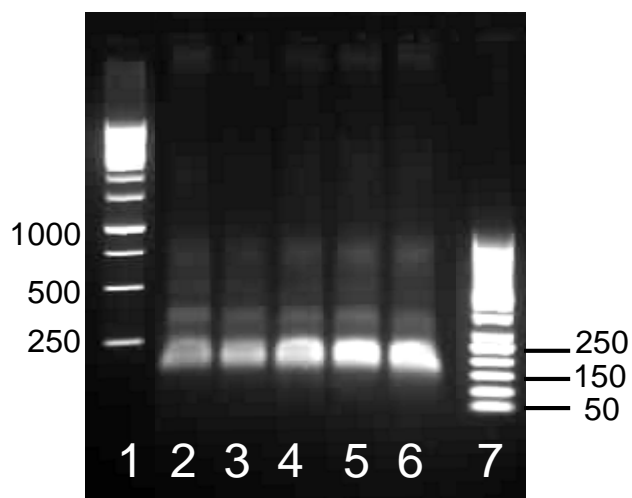**C**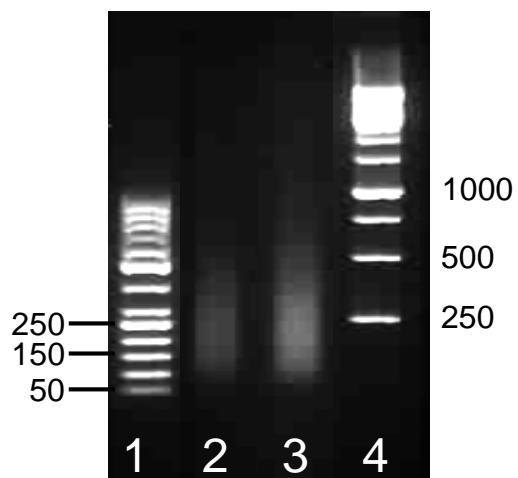**D**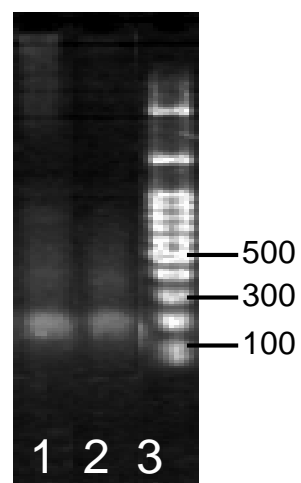

**Table S1: ChIP-qPCR primers**

| Primer name   | Forward primer                | Reverse primer                 | Product size (bp) |
|---------------|-------------------------------|--------------------------------|-------------------|
| PAX5          | 5'-GCATTTGAGTTGTCAGTCTATTC-3' | 5'-GTGCTACCCGTCCGAATTAC-3'     | 158               |
| SOX2          | 5'-AACGGATCGCCTACCTACAG-3'    | 5'-GAATGAGACGAGGAGGTGACTAC-3'  | 193               |
| GAPDH         | 5'-AGACAGGAACAAGGCGTAGTG-3'   | 5'-CCTTGAAGTGCCGTGTGTAG-3'     | 131               |
| Common peak 1 | 5'-GGTGGGTGGGATGGTTATC-3'     | 5'-GCTGTCTGTGTACAGGGAATTAAC-3' | 103               |
| Common peak 2 | 5'-AGCCTGCGGGTAGGAAATAG-3'    | 5'-GCAGAACAAGACGCCTACAG-3'     | 96                |
| Common peak 3 | 5'-TCCAGGTGTTCCCTTTGAGTAG-3'  | 5'-GGTCTCTCCAATCTGGGATAC-3'    | 91                |
| Common peak 4 | 5'-TCCATTCCAGCTCTTAATAC-3'    | 5'-CTTCGCACATGAGCCACTAC-3'     | 162               |

**Table S2: Quantity of chromatin and DNA used throughout the protocol.** Quantification of chromatin kept for input or used for immunoprecipitation was estimated by spectrophotometry (NanoDrop ND-1000 Spectrophotometer). For all subsequent steps, DNA concentrations were determined by Qubit Fluorometric Quantitation (Qubit dsDNA Assay Kit, Thermo Scientific, Waltham, USA).

| Protocol                                                         | X-ChIP |          |        |          | N-ChIP |          |        |          |
|------------------------------------------------------------------|--------|----------|--------|----------|--------|----------|--------|----------|
| Sample                                                           | X_R1   |          | X_R2   |          | N_R1   |          | N_R2   |          |
| Fraction                                                         | input  | H3K27me3 | input  | H3K27me3 | input  | H3K27me3 | input  | H3K27me3 |
| Chromatin kept for input or used for IP ( $\mu\text{g}$ )        | 1.8    | 6        | 1.8    | 6.4      | 2.5    | 5        | 2.5    | 5        |
| DNA obtained after reverse-crosslink and purification or IP (ng) | 604.42 | 59.19    | 746.68 | 96.27    | 301.86 | 26.1     | 477.31 | 41.83    |
| DNA used for library preparation (ng)                            | 100.17 | 10.14    | 100.25 | 10.18    | 100.62 | 10.09    | 100.77 | 10.23    |
| DNA obtained from library preparation (ng)                       | 129.74 | 84.27    | 126.60 | 65.43    | 177.48 | 129.30   | 143.85 | 174.37   |

**Figure S2: Quality assessment of the sequencing reads.** Quality was determined by the FastQC q30 value (Babraham Bioinformatics, version 0.11.2, arguments --nogroup -casava). q30 is the percentage of bases above a Qscore of 30. (A) H3K27me3 X\_R1 reads from muscle, q30: 94.05 %; (B) Input X\_R1 reads from muscle, q30: 93.98 %; (C) H3K27me3 X\_R2 reads from muscle, q30: 93.98 %; (D) Input X\_R2 reads from muscle, q30: 94.16 %; (E) H3K27me3 N\_R1 reads from muscle, q30: 97.21 %; (F) Input N\_R1 reads from muscle, q30: 97.31 %; (G) H3K27me3 N\_R2 reads from muscle, q30: 97.15 %; (H) Input N\_R2 reads from muscle, q30: 97.22 %; (I) H3K27me3 HT\_X\_R1 reads, q30: 97.28 %; (J) Input HT\_X\_R1 reads, q30: 97.39 %; (K) H3K27me3 HT\_X\_R2 reads, q30: 96.89 %; (L) Input HT\_X\_R2 reads, q30: 96.84 %.

**A**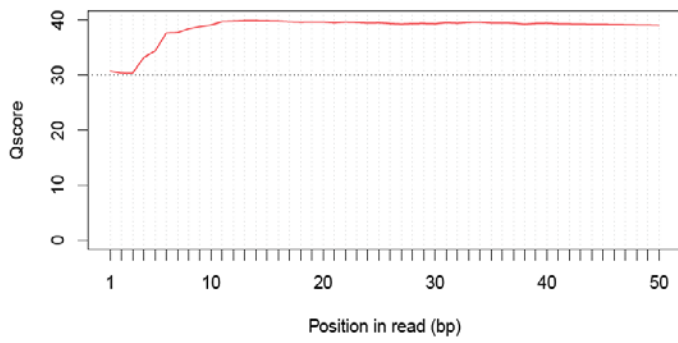**B**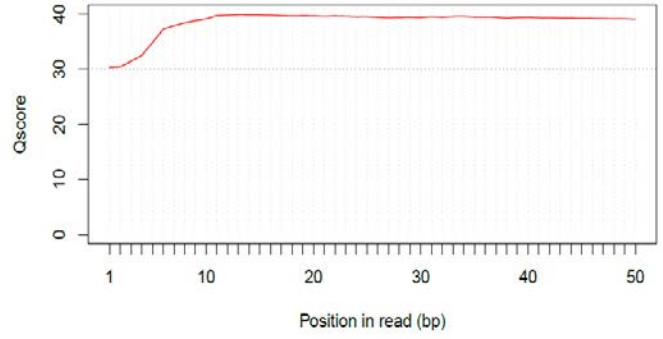**C**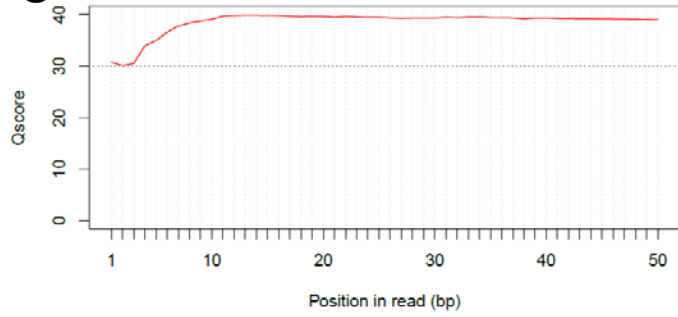**D**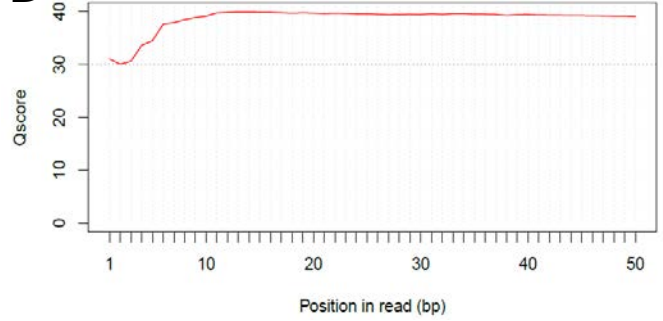**E**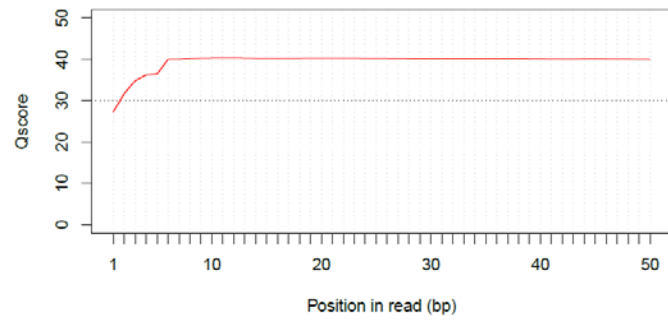**F**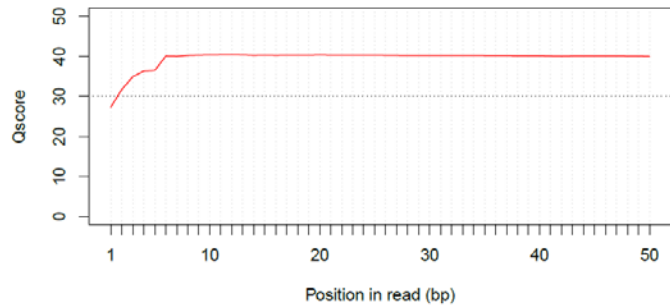**G**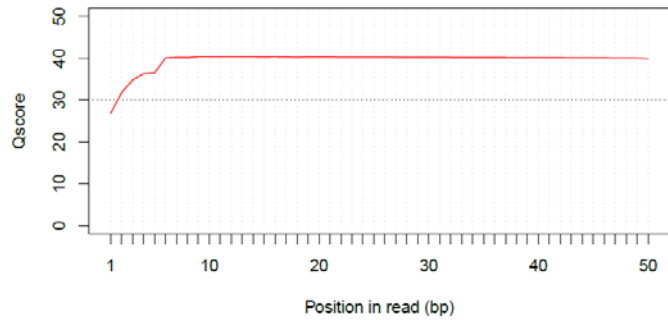**H**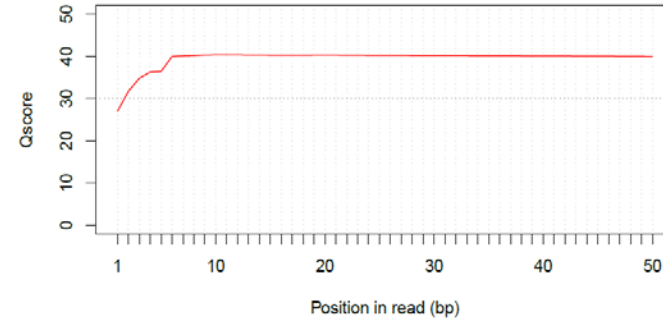

**I**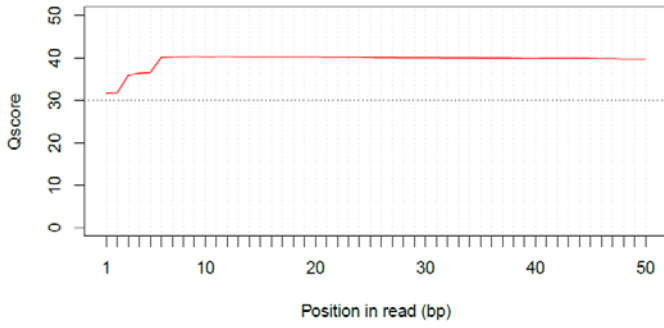**J**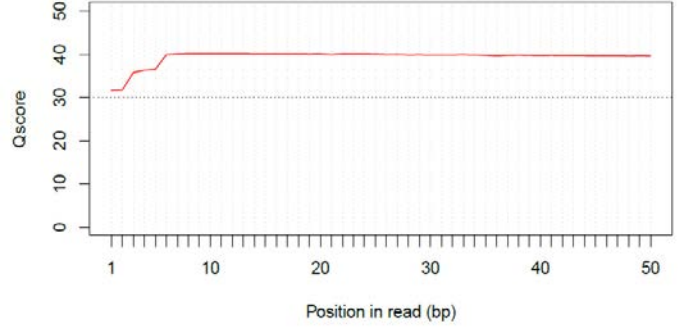**K**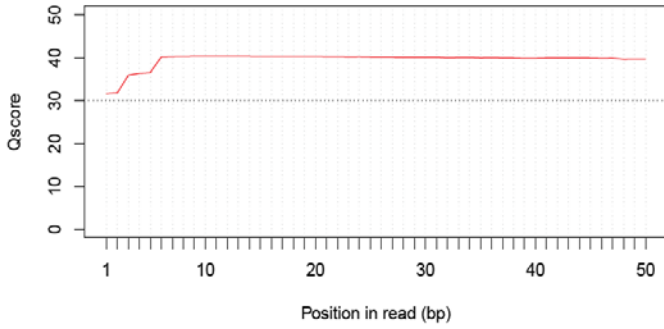**L**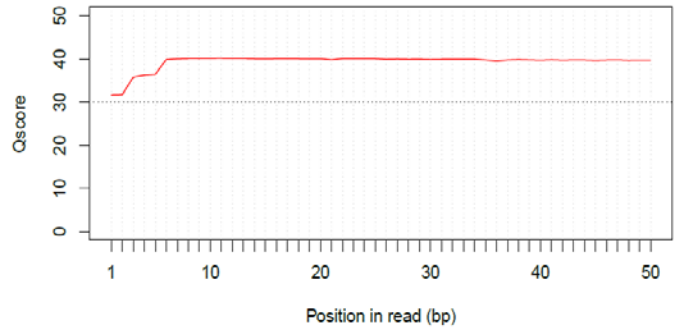

**Figure S3: Boxplot representing the distribution of the 40M peaks lengths.** Boxplots of peak width (A) with or (B) without outliers (using the argument `outline=F`) were determined using the R boxplot function on 40M datasets. Common peaks between X-ChIP-seq replicates are shown in blue (median width: 2000 bp), N-ChIP-seq common peaks in red (median width: 2600 bp).



**A**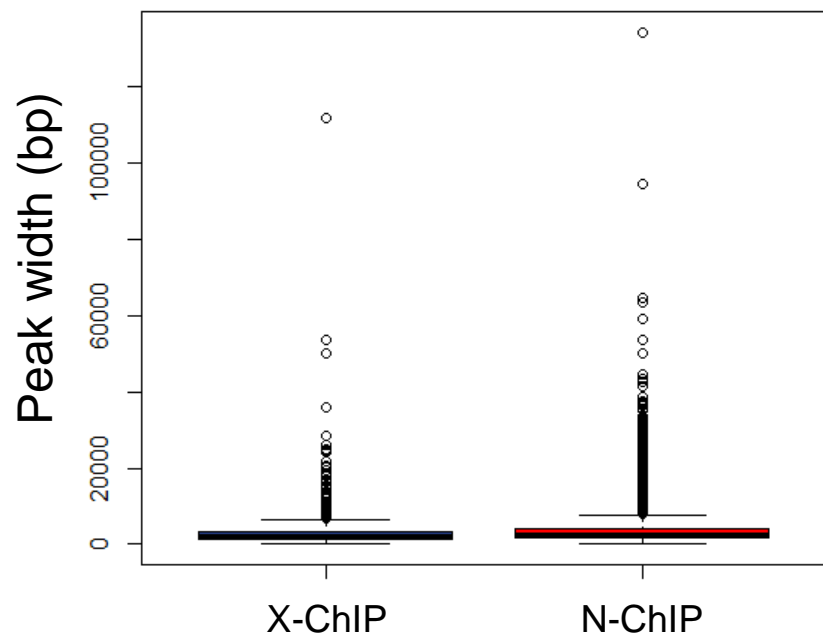**B**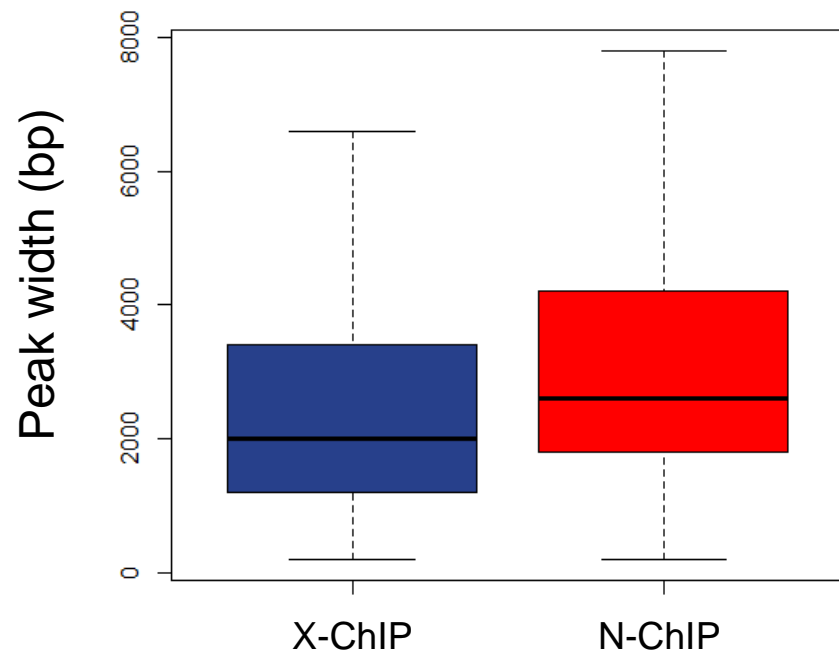

**Figure S4: X-ChIP-seq and N-ChIP-seq peaks analysis.** (A-C) Covplots were calculated with ChIPseeker on 40M datasets (Yu G, Wang L and He Q, 2015). (A) Covplot of X-ChIP-seq common peaks; (B) Covplot of N-ChIP-seq common peaks; (C) Covplot of Merged covplot of both X-ChIP-seq peaks (blue) and N-ChIP-seq peaks (red); (D) Profile of common peak data around the TSS (+/- 10 Kb of the TSS) obtained using the plotAvgProf command of ChIPseeker. X\_Ri: common X-ChIP-seq peaks, N\_Ri: common N-ChIP-seq peaks; (E) Correlation analysis of H3K27me3 peak localization with relative expression value. Transcriptome data from Loyau T *et al.* (2016) was used. Expression values were computed from microarray data (8 x 60 K) corresponding to male control animals of the same age (35d), line (Cobb500) and tissue (*P. major*) for all probes. Probe sequences were aligned against the Galgal5 genome (NCBI) using blastn (default parameters) and the probes displaying 100% of identity were kept, corresponding to 13965 unique genes with expression values. The intersection of expression values and peaks was performed in R (R Development Core Team, 2008) using Rstudio (RStudio Team, 2015) based on the following criteria: presence of a peak within the gene coordinates (5'UTR-3'UTR). The CRAN package ggplot2 was used to generate the density plot (left) and the boxplot (right) of mean expression values for all genes and the genes that contained a peak from the N-ChIP-seq (N-Ri) or X-ChIP-seq (X-Ri) analysis (only common peaks between replicates were used).

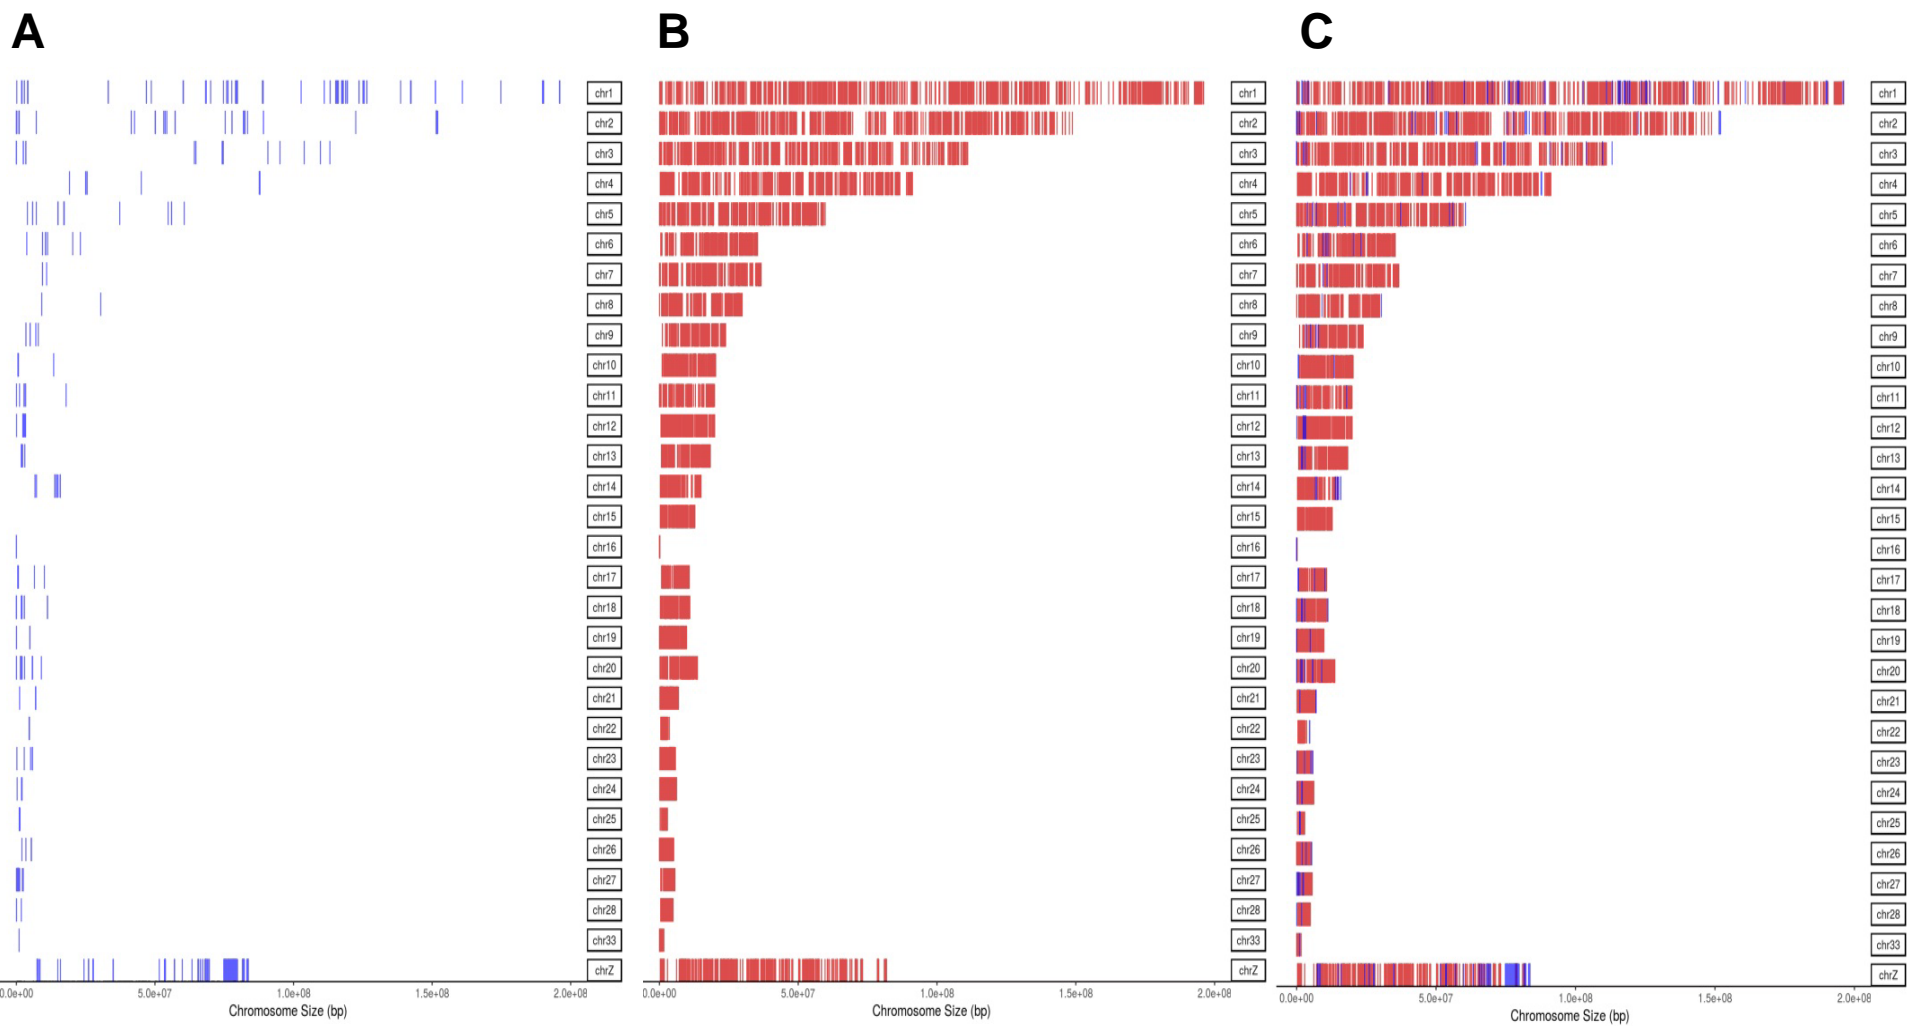

**D**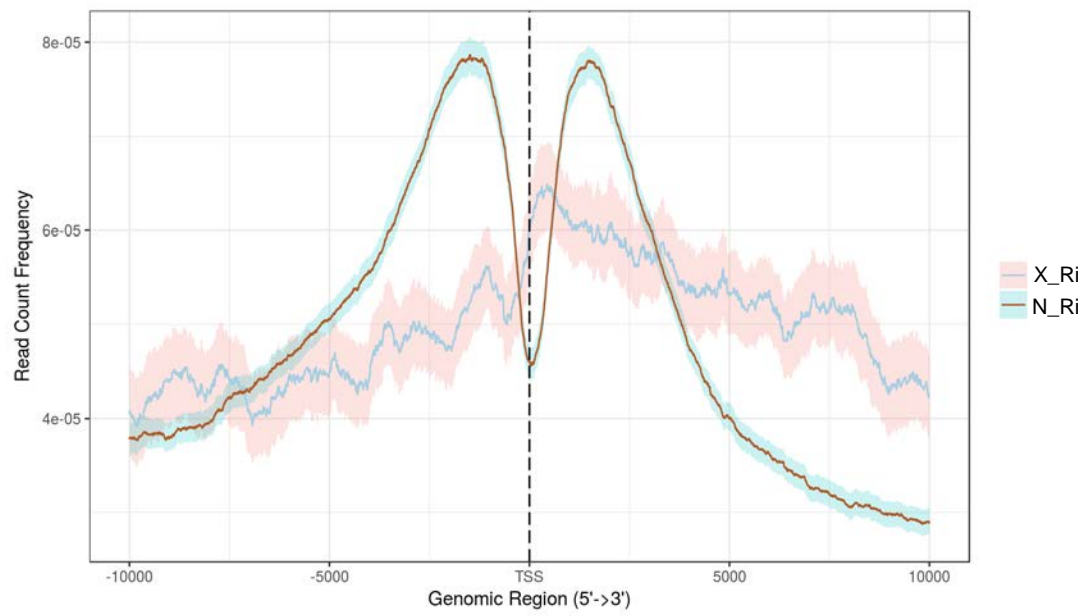**E**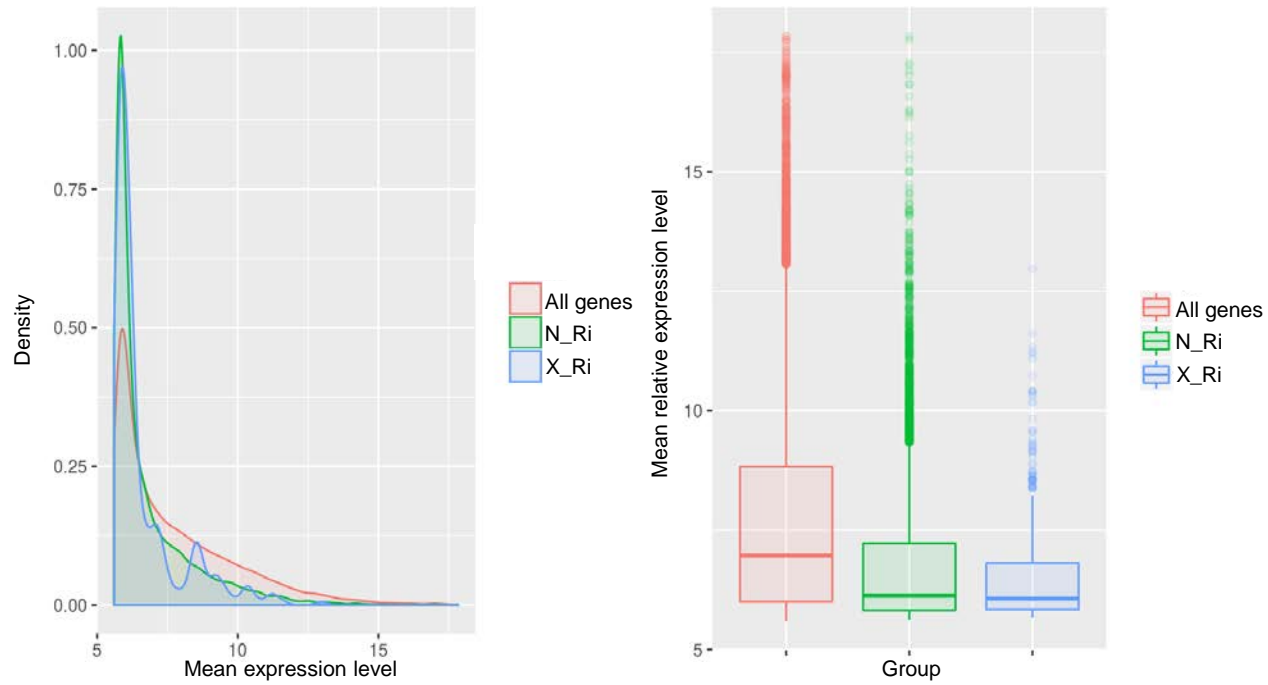

**Table S3: Broad peak detection analysis by MACS2 for both H3K27me3 X-ChIP-seq and N-ChIP-seq experiments.** 40 million of unique reads per sample were randomly selected among the uniquely mapped reads for each replicate and broad peak detection was performed with the peak caller MACS2 (MACS2\_callpeak 2.1.0.20140616, bandwidth 300, q-value 0.05, build model OFF, broad peaks ON).

| Method               | X-ChIP |        | N-ChIP |       |
|----------------------|--------|--------|--------|-------|
| Sample               | X_R1   | X_R2   | N_R1   | N_R2  |
| Peak number          | 38     | 32     | 17113  | 17591 |
| Genome coverage (Mb) | 0.0186 | 0.0154 | 36.60  | 35.36 |

**Figure S5: Comparison of H3K27me3-enriched peak regions detected by MACS2 and between MACS2 and epic.** (A) Venn diagram representing the intersection between broad peak regions detected by MACS2 for both X-ChIP-seq replicates. No common regions were found. (B) Venn diagram representing the overlap between broad peak regions detected by MACS2 for N-ChIP-seq replicates. (C) Venn diagram representing the intersection between broad peak regions common to both N-ChIP-seq replicates detected by epic and MACS2.

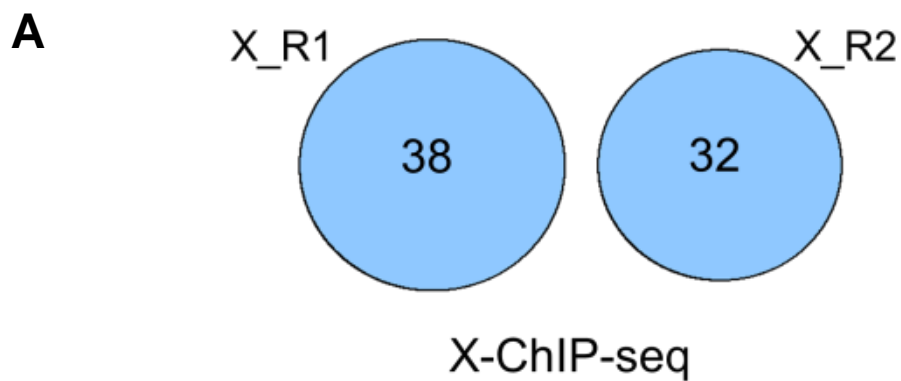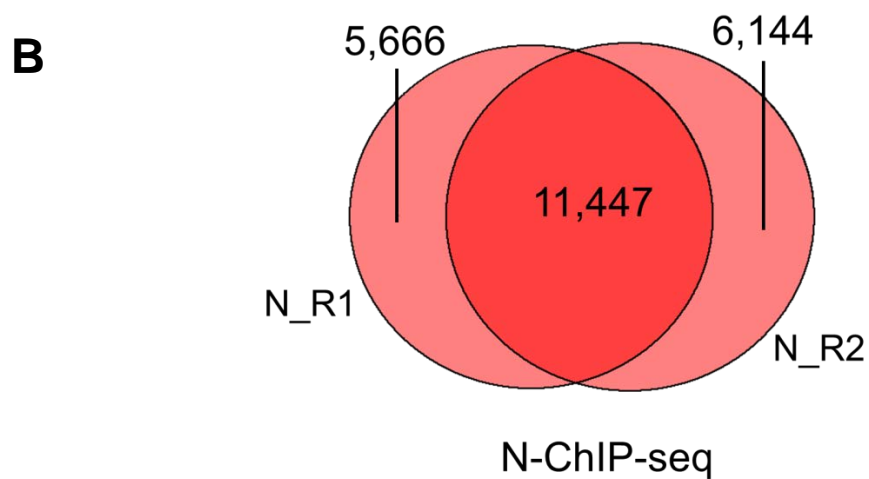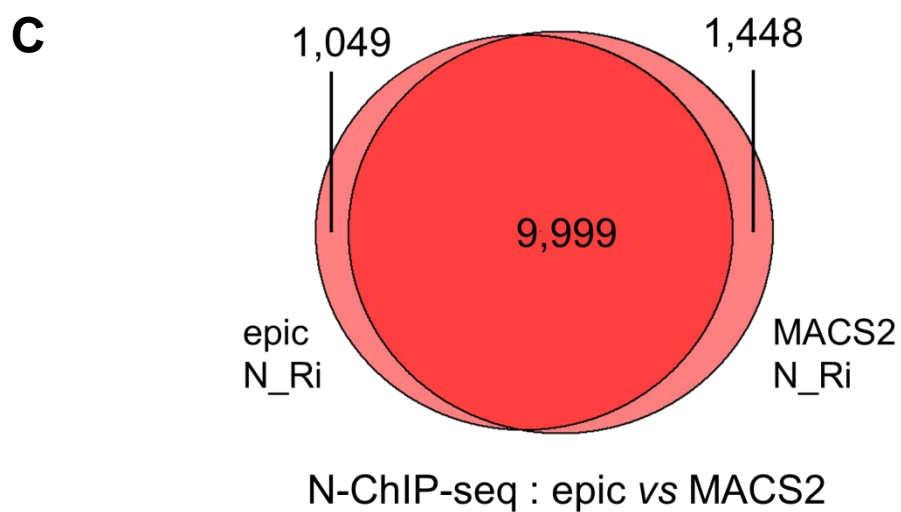

### **Supplemental methods: X-ChIP-seq protocol for hypothalamus tissue samples**

Hypothalamus tissues were snap frozen at sampling. Samples were ground in a mortar with a pestle cooled with liquid nitrogen then resuspended in 900  $\mu$ L of ice-cold PBS-C and transferred to 1.5 mL TPX tubes. 100  $\mu$ L of crosslink buffer was added (100 mM NaCl, 1 mM EDTA pH 8, 0.5 mM EGTA pH 8, 50 mM HEPES pH 8, 1 % formaldehyde) and tubes were incubated 5 min at room temperature under shaking. The reaction was stopped by adding glycine to a final concentration of 0.125 M for 5 min at room temperature under shaking. Pellets were washed once in PBS-C and then incubated 10 min in 300  $\mu$ L of SDS lysis buffer (50 mM Tris-HCl pH 8, 20 mM EDTA pH 8, 1 % SDS, 1 X Complete™ protease inhibitors). Samples were vortexed and incubated 10 min on ice, then sonicated 4 x 5 min using the Bioruptor (high – 30 s ON / 30 s OFF). Samples were centrifuged 5 min at 10600 g and the supernatant containing the chromatin was collected and used fresh or stored at -80 °C.

Chromatin quantification, quality assessment, immunoprecipitation and Illumina sequencing were performed as described for the muscle (2.45 ng for HT\_X\_R1 and 1.1 ng for HT\_X\_R2 of IP DNA and 100 ng of input DNA were used to prepare the sequencing libraries).

**Table S4: Sequencing results of hypothalamus X-ChIP-seq analyzed using epic.** Two biological replicates were sequenced (HT\_X\_R1 and HT\_X\_R2). Reads were mapped against the Galgal5 chicken genome.

| Method                                    | X-ChIP  |          |         |          |
|-------------------------------------------|---------|----------|---------|----------|
| Sample                                    | HT_X_R1 |          | HT_X_R2 |          |
| Fraction                                  | Input   | H3K27me3 | Input   | H3K27me3 |
| Total number of uniquely mapped reads (M) | 42.44   | 94.64    | 29.23   | 112.77   |
| Total peak number                         | 13133   |          | 12531   |          |
| Total genome coverage (Mb)                | 59.70   |          | 59      |          |
| Number of common peaks between replicates | 11308   |          |         |          |

**Figure S6: Fragmentation assessment of chromatin before immunoprecipitation for hypothalamus samples and X-ChIP results at three control loci.** (A) 1% agarose stained with GelRed was used for the chromatin migration. Lane 1: GeneRuler 50 bp DNA Ladder, ref. SM0371, Thermo-Scientific, Waltham, USA. Lane 2: Replicate 1 (HT\_X\_R1). Lane 3: Replicate 2 (HT\_X\_R2). Lane 4: GeneRuler 1kb DNA Ladder, ref. SM0311, Thermo-Scientific, Waltham, USA. (B-D) IGV visualization of H3K27me3 40M unique reads signal in the hypothalamus tissue at control loci. H3K27me3 enrichments were normalized to the input [ $\log_2(\text{IP}/\text{input})$ ]. The green boxes represent broad peaks detected by epic. (B) *SOX2* (chr9: 16918111-16919468); (C) *PAX5* (chrZ: 81789479-81896738); (D) *GAPDH* (chr1: 76950864-76956805) loci.



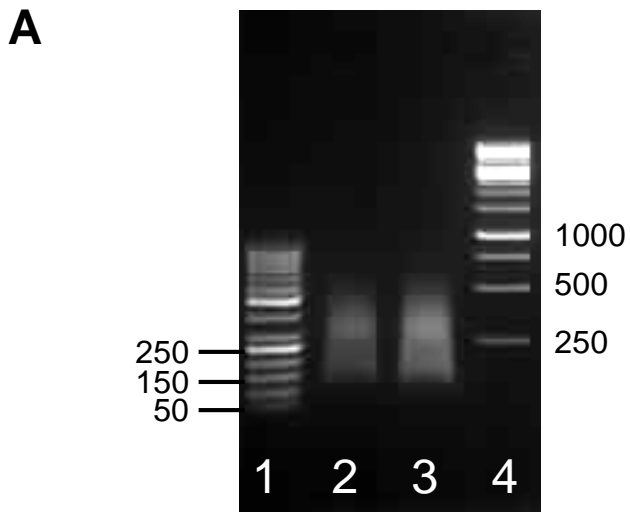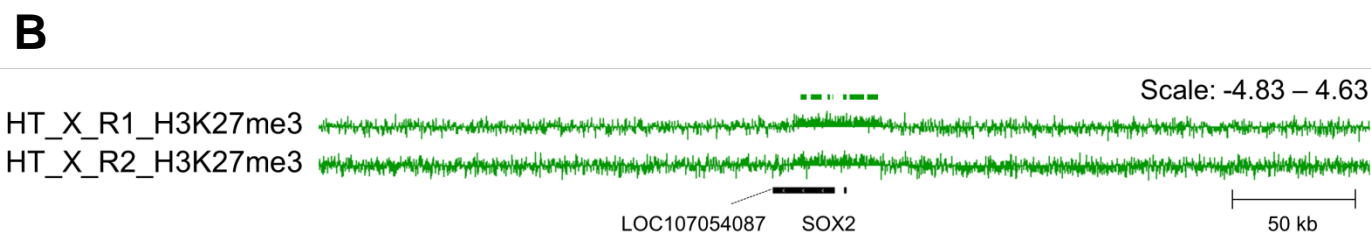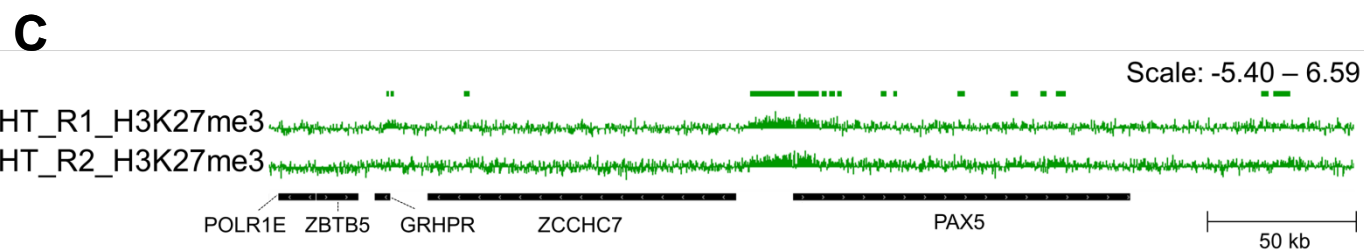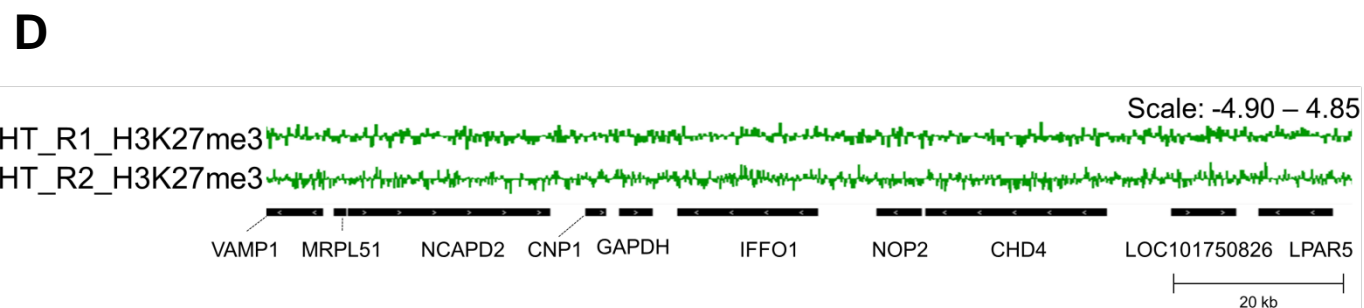

Supplement: 12575_2017_59_MOESM1_ESM.pdf [file 12575_2017_59_MOESM1_ESM.pdf]
